# Supplementary material for: 30 m annual land cover and its dynamics in China from 1990 to 2019
Source: Copernicus journal article supplement (doi:10.5194/essd-2021-7), 2021-04-20
Supplement: Supplementary file 1 [file essd-2021-7-supplement.pdf]

**Table S1. Cross-walking table between different datasets.**

| Target type |                                                                                                                                                                                  | Source type                                                                                                                                                                                                                                                                                                                                                                                                                                 |                                                                                |                     |
|-------------|----------------------------------------------------------------------------------------------------------------------------------------------------------------------------------|---------------------------------------------------------------------------------------------------------------------------------------------------------------------------------------------------------------------------------------------------------------------------------------------------------------------------------------------------------------------------------------------------------------------------------------------|--------------------------------------------------------------------------------|---------------------|
| CLCD        | MCD12Q1 (IGBP)                                                                                                                                                                   | ESACCI                                                                                                                                                                                                                                                                                                                                                                                                                                      | Geo-Wiki                                                                       | FROM-GLC            |
| Cropland    | Croplands;<br>Cropland / natural vegetation mosaics;                                                                                                                             | Cropland, rainfed;<br>Cropland, irrigated or post-flooding;<br>Mosaic cropland (>50%) / natural vegetation (tree, shrub, herbaceous cover) (<50%);<br>Mosaic natural vegetation (tree, shrub, herbaceous cover)(>50%/cropland);                                                                                                                                                                                                             | Cultivated and Managed;<br>Mosaic: Cultivated and Managed /Natural Vegetation; | Cropland;           |
| Forest      | Evergreen needleleaf forests;<br>Evergreen broadleaf forests;<br>Deciduous needleleaf forests;<br>Deciduous broadleaf forests;<br>Mixed forests;<br>Woody savannas;<br>Savannas; | Tree cover, needleleaved, evergreen, closed to open (>15%);<br>Tree cover, needleleaved, deciduous, closed to open (>15%);<br>Tree cover, mixed leaf type (broadleaved and needleleaved);<br>Tree cover, broadleaved, evergreen, closed to open (>15%);<br>Tree cover, broadleaved, deciduous, closed to open (>15%);<br>Mosaic tree and shrub (>50%) / herbaceous cover (<50%);<br>Mosaic herbaceous cover (>50%) / tree and shrub (<50%); | Tree Cover;                                                                    | Forest;             |
| Shrub       | Closed shrublands;<br>Open shrublands;                                                                                                                                           | Shrubland;                                                                                                                                                                                                                                                                                                                                                                                                                                  | Shrub Cover;                                                                   | Shrubland;          |
| Grassland   | Grasslands;                                                                                                                                                                      | Grassland;<br>Sparse vegetation (tree, shrub, herbaceous cover) (<15%);<br>Lichens and mosses;                                                                                                                                                                                                                                                                                                                                              | Herbaceous Vegetation /<br>Grassland;                                          | Grassland;          |
| Water       | Water bodies;                                                                                                                                                                    | Water bodies;                                                                                                                                                                                                                                                                                                                                                                                                                               | Open Water;                                                                    | Water;              |
| Snow/Ice    | Snow and ice;                                                                                                                                                                    | Permanent snow and ice;                                                                                                                                                                                                                                                                                                                                                                                                                     | Snow and Ice;                                                                  | Snow/Ice;           |
| Barren      | Barren;                                                                                                                                                                          | Bare areas;                                                                                                                                                                                                                                                                                                                                                                                                                                 | Barren;                                                                        | Bareland;           |
| Impervious  | Urban and built-up lands;                                                                                                                                                        | Urban areas;                                                                                                                                                                                                                                                                                                                                                                                                                                | Urban / Built Up;                                                              | Impervious surface; |
| Wetland     | Permanent wetlands;                                                                                                                                                              | Shrub or herbaceous cover, flooded, fresh/saline/brakish water;                                                                                                                                                                                                                                                                                                                                                                             | Regularly Flooded / Wetland;                                                   | Wetland;            |
| Excluded    |                                                                                                                                                                                  | Tree cover, flooded, fresh or brakish water;<br>Tree cover, flooded, saline water;                                                                                                                                                                                                                                                                                                                                                          |                                                                                | Cloud;<br>Tundra;   |

**Table S2. Land cover transition matrix. logical conversions in the matrix are labeled as "Yes" while illogical conversions are labeled as "No".**

|      |            | To       |        |       |           |       |          |        |            |         |
|------|------------|----------|--------|-------|-----------|-------|----------|--------|------------|---------|
|      |            | Cropland | Forest | Shrub | Grassland | Water | Snow/Ice | Barren | Impervious | Wetland |
| From | Cropland   | Yes      | Yes    | Yes   | Yes       | Yes   | No       | No     | Yes        | No      |
|      | Forest     | Yes      | Yes    | Yes   | No        | No    | No       | No     | Yes        | No      |
|      | Shrub      | Yes      | Yes    | Yes   | Yes       | No    | No       | No     | No         | No      |
|      | Grassland  | Yes      | Yes    | Yes   | Yes       | Yes   | No       | Yes    | Yes        | Yes     |
|      | Water      | Yes      | Yes    | Yes   | Yes       | Yes   | No       | Yes    | Yes        | No      |
|      | Snow/Ice   | No       | No     | No    | Yes       | Yes   | Yes      | Yes    | No         | No      |
|      | Barren     | Yes      | Yes    | No    | Yes       | Yes   | Yes      | Yes    | Yes        | No      |
|      | Impervious | No       | No     | No    | No        | Yes   | No       | No     | Yes        | No      |
|      | Wetland    | Yes      | No     | Yes   | Yes       | Yes   | No       | No     | No         | Yes     |

**Table S3. Confusion matrix of CLCD in 1985 based on visually-interpreted test samples. PA and UA are abbreviations for the producer's accuracy and user's accuracy, respectively. Bold number represents the overall accuracy.**

|                                     |            | <b>CLCD</b>     |               |              |                  |              |                 |               |                   |            |               |
|-------------------------------------|------------|-----------------|---------------|--------------|------------------|--------------|-----------------|---------------|-------------------|------------|---------------|
| <b>Class</b>                        |            | <b>Cropland</b> | <b>Forest</b> | <b>Shrub</b> | <b>Grassland</b> | <b>Water</b> | <b>Snow/Ice</b> | <b>Barren</b> | <b>Impervious</b> | <b>SUM</b> | <b>UA (%)</b> |
| <b>visually-interpreted samples</b> | Cropland   | 121             | 13            | 0            | 8                | 0            | 0               | 0             | 4                 | 146        | 82.88         |
|                                     | Forest     | 6               | 121           | 0            | 5                | 0            | 0               | 0             | 0                 | 132        | 91.67         |
|                                     | Shrub      | 3               | 6             | 5            | 6                | 0            | 0               | 0             | 0                 | 20         | 25.00         |
|                                     | Grassland  | 13              | 12            | 5            | 153              | 0            | 0               | 14            | 0                 | 197        | 77.66         |
|                                     | Water      | 1               | 0             | 0            | 1                | 21           | 0               | 0             | 1                 | 24         | 87.50         |
|                                     | Snow/Ice   | 0               | 0             | 0            | 0                | 0            | 16              | 1             | 0                 | 17         | 94.12         |
|                                     | Barren     | 1               | 0             | 0            | 67               | 1            | 3               | 127           | 0                 | 199        | 63.82         |
|                                     | Impervious | 7               | 0             | 0            | 1                | 0            | 0               | 0             | 17                | 25         | 68.00         |
|                                     | SUM        | 152             | 152           | 10           | 241              | 22           | 19              | 142           | 22                | 760        |               |
|                                     | PA (%)     | 79.61           | 79.61         | 50.00        | 63.49            | 95.45        | 84.21           | 89.44         | 77.27             |            | <b>76.45</b>  |

**Table S4. Confusion matrix of CLCD in 1992 based on visually-interpreted test samples. PA and UA are abbreviations for the producer's accuracy and user's accuracy, respectively. Bold number represents the overall accuracy.**

|                                     |            | <b>CLCD</b>     |               |              |                  |              |                 |               |                   |            |               |
|-------------------------------------|------------|-----------------|---------------|--------------|------------------|--------------|-----------------|---------------|-------------------|------------|---------------|
| <b>Class</b>                        |            | <b>Cropland</b> | <b>Forest</b> | <b>Shrub</b> | <b>Grassland</b> | <b>Water</b> | <b>Snow/Ice</b> | <b>Barren</b> | <b>Impervious</b> | <b>SUM</b> | <b>UA (%)</b> |
| <b>visually-interpreted samples</b> | Cropland   | 146             | 7             | 0            | 17               | 0            | 0               | 2             | 4                 | 176        | 82.95         |
|                                     | Forest     | 7               | 133           | 0            | 6                | 0            | 0               | 0             | 1                 | 147        | 90.48         |
|                                     | Shrub      | 1               | 8             | 4            | 5                | 0            | 0               | 1             | 0                 | 19         | 21.05         |
|                                     | Grassland  | 3               | 20            | 4            | 130              | 0            | 3               | 17            | 0                 | 177        | 73.45         |
|                                     | Water      | 0               | 0             | 0            | 0                | 15           | 0               | 1             | 0                 | 16         | 93.75         |
|                                     | Snow/Ice   | 0               | 0             | 0            | 0                | 0            | 6               | 0             | 0                 | 6          | 100.00        |
|                                     | Barren     | 0               | 0             | 0            | 54               | 0            | 2               | 134           | 0                 | 190        | 70.53         |
|                                     | Impervious | 11              | 0             | 0            | 0                | 0            | 0               | 0             | 16                | 27         | 59.26         |
|                                     | SUM        | 168             | 168           | 8            | 212              | 15           | 11              | 155           | 21                | 758        |               |
|                                     | PA (%)     | 86.90           | 79.17         | 50.00        | 61.32            | 100.00       | 54.55           | 86.45         | 76.19             |            | <b>77.04</b>  |

**Table S5. Confusion matrix of CLCD in 1997 based on visually-interpreted test samples. PA and UA are abbreviations for the producer's accuracy and user's accuracy, respectively. Bold number represents the overall accuracy.**

|                                     |            | CLCD     |        |       |           |       |          |        |            |     |              |
|-------------------------------------|------------|----------|--------|-------|-----------|-------|----------|--------|------------|-----|--------------|
| Class                               |            | Cropland | Forest | Shrub | Grassland | Water | Snow/Ice | Barren | Impervious | SUM | UA (%)       |
| <b>Visually-interpreted samples</b> | Cropland   | 147      | 11     | 1     | 15        | 0     | 0        | 1      | 1          | 176 | 83.52        |
|                                     | Forest     | 8        | 124    | 2     | 4         | 0     | 0        | 0      | 0          | 138 | 89.86        |
|                                     | Shrub      | 2        | 5      | 6     | 2         | 0     | 0        | 1      | 0          | 16  | 37.50        |
|                                     | Grassland  | 9        | 13     | 1     | 152       | 0     | 2        | 9      | 0          | 186 | 81.72        |
|                                     | Water      | 1        | 0      | 0     | 1         | 14    | 1        | 0      | 0          | 17  | 82.35        |
|                                     | Snow/Ice   | 0        | 0      | 0     | 0         | 0     | 13       | 2      | 0          | 15  | 86.67        |
|                                     | Barren     | 1        | 0      | 0     | 45        | 1     | 3        | 145    | 1          | 196 | 73.98        |
|                                     | Impervious | 10       | 1      | 0     | 1         | 0     | 0        | 0      | 12         | 24  | 50.00        |
|                                     | SUM        | 178      | 154    | 10    | 220       | 15    | 19       | 158    | 14         | 768 |              |
|                                     | PA (%)     | 82.58    | 80.52  | 60.00 | 69.09     | 93.33 | 68.42    | 91.77  | 85.71      |     | <b>79.82</b> |

**Table S6. Confusion matrix of CLCD in 2002 based on visually-interpreted test samples. PA and UA are abbreviations for the producer's accuracy and user's accuracy, respectively. Bold number represents the overall accuracy.**

|                                     |            | <b>CLCD</b>     |               |              |                  |              |                 |               |                   |            |               |
|-------------------------------------|------------|-----------------|---------------|--------------|------------------|--------------|-----------------|---------------|-------------------|------------|---------------|
| <b>Class</b>                        |            | <b>Cropland</b> | <b>Forest</b> | <b>Shrub</b> | <b>Grassland</b> | <b>Water</b> | <b>Snow/Ice</b> | <b>Barren</b> | <b>Impervious</b> | <b>SUM</b> | <b>UA (%)</b> |
| <b>Visually-interpreted samples</b> | Cropland   | 169             | 8             | 1            | 15               | 1            | 0               | 1             | 4                 | 199        | 84.92         |
|                                     | Forest     | 7               | 153           | 0            | 8                | 0            | 0               | 0             | 0                 | 168        | 91.07         |
|                                     | Shrub      | 3               | 13            | 8            | 2                | 0            | 0               | 0             | 0                 | 26         | 30.77         |
|                                     | Grassland  | 10              | 12            | 2            | 130              | 0            | 0               | 7             | 2                 | 163        | 79.75         |
|                                     | Water      | 0               | 1             | 0            | 1                | 16           | 0               | 1             | 0                 | 19         | 84.21         |
|                                     | Snow/Ice   | 0               | 0             | 0            | 0                | 0            | 13              | 1             | 0                 | 14         | 92.86         |
|                                     | Barren     | 0               | 0             | 0            | 46               | 0            | 1               | 152           | 1                 | 200        | 76.00         |
|                                     | Impervious | 7               | 1             | 0            | 1                | 0            | 0               | 0             | 28                | 37         | 75.68         |
|                                     | SUM        | 196             | 188           | 11           | 203              | 17           | 14              | 162           | 35                | 826        |               |
|                                     | PA (%)     | 86.22           | 81.38         | 72.73        | 64.04            | 94.12        | 92.86           | 93.83         | 80.00             |            | <b>80.99</b>  |

**Table S7. Confusion matrix of CLCD in 2007 based on visually-interpreted test samples. PA and UA are abbreviations for the producer's accuracy and user's accuracy, respectively. Bold number represents the overall accuracy.**

|                                     |            | <b>CLCD</b>     |               |              |                  |              |                 |               |                   |            |               |
|-------------------------------------|------------|-----------------|---------------|--------------|------------------|--------------|-----------------|---------------|-------------------|------------|---------------|
| <b>Class</b>                        |            | <b>Cropland</b> | <b>Forest</b> | <b>Shrub</b> | <b>Grassland</b> | <b>Water</b> | <b>Snow/Ice</b> | <b>Barren</b> | <b>Impervious</b> | <b>SUM</b> | <b>UA (%)</b> |
| <b>Visually-interpreted samples</b> | Cropland   | 136             | 5             | 0            | 8                | 1            | 0               | 0             | 4                 | 154        | 88.31         |
|                                     | Forest     | 14              | 129           | 2            | 6                | 0            | 1               | 0             | 0                 | 152        | 84.87         |
|                                     | Shrub      | 4               | 9             | 7            | 4                | 0            | 0               | 0             | 0                 | 24         | 29.17         |
|                                     | Grassland  | 7               | 6             | 1            | 138              | 1            | 1               | 8             | 2                 | 164        | 84.15         |
|                                     | Water      | 2               | 0             | 0            | 0                | 13           | 0               | 0             | 0                 | 15         | 86.67         |
|                                     | Snow/Ice   | 0               | 0             | 0            | 0                | 0            | 11              | 0             | 0                 | 11         | 100.00        |
|                                     | Barren     | 2               | 0             | 0            | 49               | 1            | 0               | 143           | 2                 | 197        | 72.59         |
|                                     | Impervious | 12              | 0             | 0            | 1                | 0            | 0               | 0             | 29                | 42         | 69.05         |
|                                     | SUM        | 177             | 149           | 10           | 206              | 16           | 13              | 151           | 37                | 759        |               |
|                                     | PA (%)     | 76.84           | 86.58         | 70.00        | 66.99            | 81.25        | 84.62           | 94.70         | 78.38             |            | <b>79.84</b>  |

**Table S8. Confusion matrix of CLCD in 2012 based on visually-interpreted test samples. PA and UA are abbreviations for the producer's accuracy and user's accuracy, respectively. Bold number represents the overall accuracy.**

|                                     |            | <b>CLCD</b>     |               |              |                  |              |                 |               |                   |            |               |
|-------------------------------------|------------|-----------------|---------------|--------------|------------------|--------------|-----------------|---------------|-------------------|------------|---------------|
| <b>Class</b>                        |            | <b>Cropland</b> | <b>Forest</b> | <b>Shrub</b> | <b>Grassland</b> | <b>Water</b> | <b>Snow/Ice</b> | <b>Barren</b> | <b>Impervious</b> | <b>SUM</b> | <b>UA (%)</b> |
| <b>Visually-interpreted samples</b> | Cropland   | 139             | 3             | 0            | 12               | 2            | 0               | 0             | 3                 | 159        | 87.42         |
|                                     | Forest     | 9               | 154           | 0            | 7                | 0            | 0               | 0             | 1                 | 171        | 90.06         |
|                                     | Shrub      | 3               | 14            | 5            | 3                | 0            | 0               | 0             | 0                 | 25         | 20.00         |
|                                     | Grassland  | 20              | 7             | 1            | 144              | 0            | 2               | 2             | 0                 | 176        | 81.82         |
|                                     | Water      | 1               | 0             | 0            | 0                | 16           | 0               | 0             | 0                 | 17         | 94.12         |
|                                     | Snow/Ice   | 0               | 0             | 0            | 2                | 0            | 12              | 0             | 0                 | 14         | 85.71         |
|                                     | Barren     | 0               | 0             | 0            | 33               | 1            | 3               | 139           | 0                 | 176        | 78.98         |
|                                     | Impervious | 4               | 0             | 0            | 1                | 0            | 0               | 0             | 23                | 28         | 82.14         |
|                                     | SUM        | 176             | 178           | 6            | 202              | 19           | 17              | 141           | 27                | 766        |               |
|                                     | PA (%)     | 78.98           | 86.52         | 83.33        | 71.29            | 84.21        | 70.59           | 98.58         | 85.19             |            | <b>82.51</b>  |



**Table S9. Confusion matrix of CLCD in 2017 based on visually-interpreted test samples. PA and UA are abbreviations for the producer's accuracy and user's accuracy, respectively. Bold number represents the overall accuracy.**

|                                     |            | <b>CLCD</b>     |               |              |                  |              |                 |               |                   |            |               |
|-------------------------------------|------------|-----------------|---------------|--------------|------------------|--------------|-----------------|---------------|-------------------|------------|---------------|
| <b>Class</b>                        |            | <b>Cropland</b> | <b>Forest</b> | <b>Shrub</b> | <b>Grassland</b> | <b>Water</b> | <b>Snow/Ice</b> | <b>Barren</b> | <b>Impervious</b> | <b>SUM</b> | <b>UA (%)</b> |
| <b>Visually-interpreted samples</b> | Cropland   | 105             | 14            | 0            | 8                | 1            | 0               | 1             | 0                 | 129        | 81.40         |
|                                     | Forest     | 17              | 162           | 1            | 12               | 0            | 0               | 0             | 0                 | 192        | 84.38         |
|                                     | Shrub      | 3               | 13            | 3            | 7                | 0            | 0               | 0             | 0                 | 26         | 11.54         |
|                                     | Grassland  | 10              | 2             | 1            | 135              | 0            | 1               | 6             | 0                 | 155        | 87.10         |
|                                     | Water      | 4               | 2             | 0            | 0                | 13           | 0               | 1             | 1                 | 21         | 61.90         |
|                                     | Snow/Ice   | 0               | 0             | 0            | 1                | 0            | 13              | 1             | 0                 | 15         | 86.67         |
|                                     | Barren     | 1               | 0             | 0            | 53               | 1            | 1               | 196           | 3                 | 255        | 76.86         |
|                                     | Impervious | 7               | 1             | 0            | 3                | 0            | 0               | 1             | 21                | 33         | 63.64         |
|                                     | SUM        | 147             | 194           | 5            | 219              | 15           | 15              | 206           | 25                | 826        |               |
|                                     | PA (%)     | 71.43           | 83.51         | 60.00        | 61.64            | 86.67        | 86.67           | 95.15         | 84.00             |            | <b>78.45</b>  |

**Table S10. Confusion matrix of ESACCI\_LC in 1992 based on visually-interpreted test samples. PA and UA are abbreviations for the producer's accuracy and user's accuracy, respectively. Bold number represents the overall accuracy.**

|                                     |            | ESACCI LC |        |       |           |       |          |        |            |     |              |
|-------------------------------------|------------|-----------|--------|-------|-----------|-------|----------|--------|------------|-----|--------------|
| Class                               |            | Cropland  | Forest | Shrub | Grassland | Water | Snow/Ice | Barren | Impervious | SUM | UA (%)       |
| <b>Visually-interpreted samples</b> | Cropland   | 147       | 10     | 0     | 16        | 0     | 0        | 2      | 1          | 176 | 83.52        |
|                                     | Forest     | 23        | 117    | 3     | 3         | 1     | 0        | 0      | 0          | 147 | 79.59        |
|                                     | Shrub      | 2         | 13     | 0     | 3         | 0     | 0        | 1      | 0          | 19  | 0.00         |
|                                     | Grassland  | 29        | 15     | 0     | 117       | 1     | 0        | 14     | 1          | 177 | 66.10        |
|                                     | Water      | 2         | 0      | 0     | 0         | 14    | 0        | 0      | 0          | 16  | 87.50        |
|                                     | Snow/Ice   | 0         | 0      | 0     | 0         | 0     | 4        | 2      | 0          | 6   | 66.67        |
|                                     | Barren     | 0         | 0      | 0     | 60        | 0     | 1        | 129    | 0          | 190 | 67.89        |
|                                     | Impervious | 12        | 0      | 0     | 2         | 1     | 0        | 0      | 12         | 27  | 44.44        |
|                                     | SUM        | 215       | 155    | 3     | 201       | 17    | 5        | 148    | 14         | 758 |              |
|                                     | PA (%)     | 68.37     | 75.48  | 0.00  | 58.21     | 82.35 | 80.00    | 87.16  | 85.71      |     | <b>71.24</b> |

**Table S11. Confusion matrix of ESACCI\_LC in 1997 based on visually-interpreted test samples. PA and UA are abbreviations for the producer's accuracy and user's accuracy, respectively. Bold number represents the overall accuracy.**

|                                     |            | ESACCI LC |        |       |           |       |          |        |            | SUM | UA (%)       |
|-------------------------------------|------------|-----------|--------|-------|-----------|-------|----------|--------|------------|-----|--------------|
| Class                               |            | Cropland  | Forest | Shrub | Grassland | Water | Snow/Ice | Barren | Impervious |     |              |
| <b>Visually-interpreted samples</b> | Cropland   | 148       | 9      | 0     | 16        | 1     | 0        | 2      | 0          | 176 | 84.09        |
|                                     | Forest     | 26        | 102    | 2     | 6         | 2     | 0        | 0      | 0          | 138 | 73.91        |
|                                     | Shrub      | 3         | 9      | 0     | 3         | 0     | 0        | 1      | 0          | 16  | 0.00         |
|                                     | Grassland  | 29        | 17     | 1     | 122       | 0     | 0        | 17     | 0          | 186 | 65.59        |
|                                     | Water      | 2         | 0      | 0     | 0         | 14    | 1        | 0      | 0          | 17  | 82.35        |
|                                     | Snow/Ice   | 0         | 0      | 0     | 1         | 0     | 11       | 3      | 0          | 15  | 73.33        |
|                                     | Barren     | 5         | 0      | 3     | 62        | 2     | 4        | 120    | 0          | 196 | 61.22        |
|                                     | Impervious | 19        | 0      | 0     | 1         | 0     | 0        | 0      | 4          | 24  | 16.67        |
|                                     | SUM        | 232       | 137    | 6     | 211       | 19    | 16       | 143    | 4          | 768 |              |
|                                     | PA (%)     | 63.79     | 74.45  | 0.00  | 57.82     | 73.68 | 68.75    | 83.92  | 100.00     |     | <b>67.84</b> |

**Table S12. Confusion matrix of ESACCI\_LC in 2002 based on visually-interpreted test samples. PA and UA are abbreviations for the producer's accuracy and user's accuracy, respectively. Bold number represents the overall accuracy.**

|                                     |            | ESACCI LC |        |       |           |       |          |        |            | SUM | UA (%)       |
|-------------------------------------|------------|-----------|--------|-------|-----------|-------|----------|--------|------------|-----|--------------|
| Class                               |            | Cropland  | Forest | Shrub | Grassland | Water | Snow/Ice | Barren | Impervious |     |              |
| <b>Visually-interpreted samples</b> | Cropland   | 171       | 6      | 0     | 19        | 0     | 0        | 2      | 1          | 199 | 85.93        |
|                                     | Forest     | 37        | 124    | 2     | 4         | 1     | 0        | 0      | 0          | 168 | 73.81        |
|                                     | Shrub      | 10        | 16     | 0     | 0         | 0     | 0        | 0      | 0          | 26  | 0.00         |
|                                     | Grassland  | 29        | 7      | 0     | 116       | 0     | 1        | 10     | 0          | 163 | 71.17        |
|                                     | Water      | 2         | 0      | 0     | 0         | 16    | 0        | 1      | 0          | 19  | 84.21        |
|                                     | Snow/Ice   | 0         | 0      | 0     | 2         | 0     | 11       | 1      | 0          | 14  | 78.57        |
|                                     | Barren     | 3         | 0      | 3     | 62        | 1     | 1        | 130    | 0          | 200 | 65.00        |
|                                     | Impervious | 23        | 0      | 0     | 0         | 0     | 0        | 1      | 13         | 37  | 35.14        |
|                                     | SUM        | 275       | 153    | 5     | 203       | 18    | 13       | 145    | 14         | 826 |              |
|                                     | PA (%)     | 62.18     | 81.05  | 0.00  | 57.14     | 88.89 | 84.62    | 89.66  | 92.86      |     | <b>70.34</b> |

**Table S13. Confusion matrix of ESACCI\_LC in 2007 based on visually-interpreted test samples. PA and UA are abbreviations for the producer's accuracy and user's accuracy, respectively. Bold number represents the overall accuracy.**

|                                     |            | ESACCI LC |        |       |           |       |          |        |            | SUM | UA (%)       |
|-------------------------------------|------------|-----------|--------|-------|-----------|-------|----------|--------|------------|-----|--------------|
| Class                               |            | Cropland  | Forest | Shrub | Grassland | Water | Snow/Ice | Barren | Impervious |     |              |
| <b>Visually-interpreted samples</b> | Cropland   | 131       | 6      | 0     | 13        | 0     | 0        | 0      | 4          | 154 | 85.06        |
|                                     | Forest     | 38        | 104    | 2     | 7         | 1     | 0        | 0      | 0          | 152 | 68.42        |
|                                     | Shrub      | 13        | 7      | 1     | 3         | 0     | 0        | 0      | 0          | 24  | 4.17         |
|                                     | Grassland  | 28        | 5      | 0     | 124       | 0     | 0        | 7      | 0          | 164 | 75.61        |
|                                     | Water      | 2         | 0      | 0     | 0         | 13    | 0        | 0      | 0          | 15  | 86.67        |
|                                     | Snow/Ice   | 0         | 0      | 0     | 0         | 0     | 7        | 4      | 0          | 11  | 63.64        |
|                                     | Barren     | 4         | 1      | 1     | 69        | 0     | 0        | 122    | 0          | 197 | 61.93        |
|                                     | Impervious | 30        | 0      | 0     | 1         | 0     | 0        | 0      | 11         | 42  | 26.19        |
|                                     | SUM        | 246       | 123    | 4     | 217       | 14    | 7        | 133    | 15         | 759 |              |
|                                     | PA (%)     | 53.25     | 84.55  | 25.00 | 57.14     | 92.86 | 100.00   | 91.73  | 73.33      |     | <b>67.59</b> |

**Table S14. Confusion matrix of ESACCI\_LC in 2012 based on visually-interpreted test samples. PA and UA are abbreviations for the producer's accuracy and user's accuracy, respectively. Bold number represents the overall accuracy.**

|                                     |            | ESACCI LC |        |       |           |       |          |        |            |     |              |
|-------------------------------------|------------|-----------|--------|-------|-----------|-------|----------|--------|------------|-----|--------------|
| Class                               |            | Cropland  | Forest | Shrub | Grassland | Water | Snow/Ice | Barren | Impervious | SUM | UA (%)       |
| <b>Visually-interpreted samples</b> | Cropland   | 138       | 2      | 0     | 18        | 1     | 0        | 0      | 0          | 159 | 86.79        |
|                                     | Forest     | 39        | 122    | 1     | 8         | 0     | 0        | 1      | 0          | 171 | 71.35        |
|                                     | Shrub      | 10        | 8      | 0     | 7         | 0     | 0        | 0      | 0          | 25  | 0.00         |
|                                     | Grassland  | 28        | 11     | 1     | 131       | 0     | 0        | 5      | 0          | 176 | 74.43        |
|                                     | Water      | 2         | 0      | 0     | 1         | 14    | 0        | 0      | 0          | 17  | 82.35        |
|                                     | Snow/Ice   | 0         | 0      | 0     | 1         | 0     | 13       | 0      | 0          | 14  | 92.86        |
|                                     | Barren     | 1         | 0      | 2     | 49        | 3     | 2        | 119    | 0          | 176 | 67.61        |
|                                     | Impervious | 8         | 0      | 0     | 0         | 0     | 0        | 0      | 20         | 28  | 71.43        |
|                                     | SUM        | 226       | 143    | 4     | 215       | 18    | 15       | 125    | 20         | 766 |              |
|                                     | PA (%)     | 61.06     | 85.31  | 0.00  | 60.93     | 77.78 | 86.67    | 95.20  | 100        |     | <b>72.72</b> |

**Table S15. Confusion matrix of ESACCI\_LC in 2017 based on visually-interpreted test samples. PA and UA are abbreviations for the producer's accuracy and user's accuracy, respectively. Bold number represents the overall accuracy.**

|                                     |            | <b>MCD12Q1</b>  |               |              |                  |              |                 |               |                   |            |               |
|-------------------------------------|------------|-----------------|---------------|--------------|------------------|--------------|-----------------|---------------|-------------------|------------|---------------|
| <b>Class</b>                        |            | <b>Cropland</b> | <b>Forest</b> | <b>Shrub</b> | <b>Grassland</b> | <b>Water</b> | <b>Snow/Ice</b> | <b>Barren</b> | <b>Impervious</b> | <b>SUM</b> | <b>UA (%)</b> |
| <b>Visually-interpreted samples</b> | Cropland   | 107             | 6             | 0            | 13               | 2            | 0               | 1             | 0                 | 129        | 82.95         |
|                                     | Forest     | 59              | 126           | 0            | 6                | 0            | 0               | 0             | 1                 | 192        | 65.63         |
|                                     | Shrub      | 8               | 13            | 0            | 5                | 0            | 0               | 0             | 0                 | 26         | 0.00          |
|                                     | Grassland  | 26              | 4             | 0            | 119              | 0            | 0               | 6             | 0                 | 155        | 76.77         |
|                                     | Water      | 3               | 1             | 0            | 3                | 13           | 0               | 1             | 0                 | 21         | 61.90         |
|                                     | Snow/Ice   | 0               | 0             | 0            | 4                | 0            | 6               | 5             | 0                 | 15         | 40.00         |
|                                     | Barren     | 4               | 1             | 0            | 78               | 1            | 1               | 170           | 0                 | 255        | 66.67         |
|                                     | Impervious | 16              | 2             | 0            | 0                | 0            | 0               | 0             | 15                | 33         | 45.45         |
|                                     | SUM        | 223             | 153           | 0            | 228              | 16           | 7               | 183           | 16                | 826        |               |
|                                     | PA (%)     | 47.98           | 82.35         | 0.00         | 52.19            | 81.25        | 85.71           | 92.90         | 93.75             |            | <b>67.31</b>  |

**Table S16. Confusion matrix of MCD12Q1 in 2002 based on visually-interpreted test samples. PA and UA are abbreviations for the producer's accuracy and user's accuracy, respectively. Bold number represents the overall accuracy.**

|                                     |            | <b>MCD12Q1</b>  |               |              |                  |              |                 |               |                   |            |               |
|-------------------------------------|------------|-----------------|---------------|--------------|------------------|--------------|-----------------|---------------|-------------------|------------|---------------|
| <b>Class</b>                        |            | <b>Cropland</b> | <b>Forest</b> | <b>Shrub</b> | <b>Grassland</b> | <b>Water</b> | <b>Snow/Ice</b> | <b>Barren</b> | <b>Impervious</b> | <b>SUM</b> | <b>UA (%)</b> |
| <b>Visually-interpreted samples</b> | Cropland   | 123             | 25            | 0            | 47               | 0            | 0               | 1             | 3                 | 199        | 61.81         |
|                                     | Forest     | 4               | 147           | 0            | 17               | 0            | 0               | 0             | 0                 | 168        | 87.5          |
|                                     | Shrub      | 2               | 21            | 0            | 3                | 0            | 0               | 0             | 0                 | 26         | 0.00          |
|                                     | Grassland  | 5               | 10            | 1            | 140              | 0            | 0               | 6             | 1                 | 163        | 85.89         |
|                                     | Water      | 1               | 2             | 0            | 1                | 8            | 0               | 7             | 0                 | 19         | 42.11         |
|                                     | Snow/Ice   | 0               | 0             | 0            | 0                | 0            | 8               | 6             | 0                 | 14         | 57.14         |
|                                     | Barren     | 0               | 1             | 1            | 25               | 0            | 0               | 172           | 1                 | 200        | 86.00         |
|                                     | Impervious | 17              | 2             | 0            | 6                | 0            | 0               | 0             | 12                | 37         | 32.43         |
|                                     | SUM        | 152             | 208           | 2            | 239              | 8            | 8               | 192           | 17                | 826        |               |
|                                     | PA (%)     | 80.92           | 70.67         | 0.00         | 58.58            | 100.00       | 100.00          | 89.58         | 70.59             |            | <b>73.85</b>  |



**Table S17. Confusion matrix of MCD12Q1 in 2007 based on visually-interpreted test samples. PA and UA are abbreviations for the producer's accuracy and user's accuracy, respectively. Bold number represents the overall accuracy.**

|                                     |            | <b>MCD12Q1</b>  |               |              |                  |              |                 |               |                   |            |               |
|-------------------------------------|------------|-----------------|---------------|--------------|------------------|--------------|-----------------|---------------|-------------------|------------|---------------|
| <b>Class</b>                        |            | <b>Cropland</b> | <b>Forest</b> | <b>Shrub</b> | <b>Grassland</b> | <b>Water</b> | <b>Snow/Ice</b> | <b>Barren</b> | <b>Impervious</b> | <b>SUM</b> | <b>UA (%)</b> |
| <b>Visually-interpreted samples</b> | Cropland   | 104             | 18            | 0            | 28               | 0            | 0               | 0             | 4                 | 154        | 67.53         |
|                                     | Forest     | 12              | 126           | 1            | 13               | 0            | 0               | 0             | 0                 | 152        | 82.89         |
|                                     | Shrub      | 1               | 18            | 0            | 5                | 0            | 0               | 0             | 0                 | 24         | 0.00          |
|                                     | Grassland  | 3               | 7             | 0            | 146              | 0            | 0               | 6             | 2                 | 164        | 89.02         |
|                                     | Water      | 1               | 3             | 0            | 0                | 9            | 0               | 2             | 0                 | 15         | 60.00         |
|                                     | Snow/Ice   | 0               | 0             | 0            | 0                | 0            | 5               | 6             | 0                 | 11         | 45.45         |
|                                     | Barren     | 1               | 2             | 0            | 26               | 0            | 0               | 168           | 0                 | 197        | 85.28         |
|                                     | Impervious | 16              | 5             | 0            | 1                | 0            | 0               | 1             | 19                | 42         | 45.24         |
|                                     | SUM        | 138             | 179           | 1            | 219              | 9            | 5               | 183           | 25                | 759        |               |
|                                     | PA (%)     | 75.36           | 70.39         | 0.00         | 66.67            | 100.00       | 100.00          | 91.80         | 76.00             |            | <b>76.02</b>  |

**Table S18. Confusion matrix of MCD12Q1 in 2012 based on visually-interpreted test samples. PA and UA are abbreviations for the producer's accuracy and user's accuracy, respectively. Bold number represents the overall accuracy.**

|                                     |            | <b>MCD12Q1</b>  |               |              |                  |              |                 |               |                   |            |               |
|-------------------------------------|------------|-----------------|---------------|--------------|------------------|--------------|-----------------|---------------|-------------------|------------|---------------|
| <b>Class</b>                        |            | <b>Cropland</b> | <b>Forest</b> | <b>Shrub</b> | <b>Grassland</b> | <b>Water</b> | <b>Snow/Ice</b> | <b>Barren</b> | <b>Impervious</b> | <b>SUM</b> | <b>UA (%)</b> |
| <b>Visually-interpreted samples</b> | Cropland   | 101             | 18            | 0            | 36               | 1            | 0               | 1             | 2                 | 159        | 63.52         |
|                                     | Forest     | 9               | 146           | 0            | 16               | 0            | 0               | 0             | 0                 | 171        | 85.38         |
|                                     | Shrub      | 2               | 13            | 0            | 10               | 0            | 0               | 0             | 0                 | 25         | 0.00          |
|                                     | Grassland  | 6               | 16            | 1            | 146              | 0            | 0               | 7             | 0                 | 176        | 82.95         |
|                                     | Water      | 0               | 1             | 0            | 1                | 14           | 0               | 1             | 0                 | 17         | 82.35         |
|                                     | Snow/Ice   | 0               | 0             | 0            | 1                | 0            | 6               | 7             | 0                 | 14         | 42.86         |
|                                     | Barren     | 0               | 0             | 0            | 16               | 0            | 0               | 160           | 0                 | 176        | 90.91         |
|                                     | Impervious | 10              | 3             | 0            | 1                | 0            | 0               | 0             | 14                | 28         | 50.00         |
|                                     | SUM        | 128             | 197           | 1            | 227              | 15           | 6               | 176           | 16                | 766        |               |
|                                     | PA (%)     | 78.91           | 74.11         | 0.00         | 64.32            | 93.33        | 100.00          | 90.91         | 87.50             |            | <b>76.63</b>  |

**Table S19. Confusion matrix of MCD12Q1 in 2017 based on visually-interpreted test samples. PA and UA are abbreviations for the producer's accuracy and user's accuracy, respectively. Bold number represents the overall accuracy.**

|                                     |            | <b>MCD12Q1</b>  |               |              |                  |              |                 |               |                   |            |               |
|-------------------------------------|------------|-----------------|---------------|--------------|------------------|--------------|-----------------|---------------|-------------------|------------|---------------|
| <b>Class</b>                        |            | <b>Cropland</b> | <b>Forest</b> | <b>Shrub</b> | <b>Grassland</b> | <b>Water</b> | <b>Snow/Ice</b> | <b>Barren</b> | <b>Impervious</b> | <b>SUM</b> | <b>UA (%)</b> |
| <b>Visually-interpreted samples</b> | Cropland   | 88              | 19            | 0            | 17               | 1            | 0               | 1             | 3                 | 129        | 68.22         |
|                                     | Forest     | 14              | 162           | 0            | 15               | 0            | 0               | 0             | 1                 | 192        | 84.38         |
|                                     | Shrub      | 3               | 16            | 0            | 6                | 0            | 0               | 1             | 0                 | 26         | 0.00          |
|                                     | Grassland  | 3               | 8             | 0            | 130              | 0            | 0               | 14            | 0                 | 155        | 83.87         |
|                                     | Water      | 2               | 7             | 0            | 1                | 7            | 0               | 3             | 1                 | 21         | 33.33         |
|                                     | Snow/Ice   | 0               | 0             | 0            | 0                | 0            | 4               | 11            | 0                 | 15         | 26.67         |
|                                     | Barren     | 0               | 2             | 1            | 35               | 1            | 0               | 216           | 0                 | 255        | 84.71         |
|                                     | Impervious | 11              | 8             | 0            | 3                | 0            | 0               | 0             | 11                | 33         | 33.33         |
|                                     | SUM        | 121             | 222           | 1            | 207              | 9            | 4               | 246           | 16                | 826        |               |
|                                     | PA (%)     | 72.73           | 72.97         | 0.00         | 62.80            | 77.78        | 100.00          | 87.80         | 68.75             |            | <b>74.82</b>  |

**Table S20. Confusion matrix of CLCD based on Geo-Wiki test samples. PA and UA are abbreviations for the producer's accuracy and user's accuracy, respectively. Bold number represents the overall accuracy.**

|                             |            | CLCD     |        |       |           |       |          |        |            |      |              |
|-----------------------------|------------|----------|--------|-------|-----------|-------|----------|--------|------------|------|--------------|
| Class                       |            | Cropland | Forest | Shrub | Grassland | Water | Snow/Ice | Barren | Impervious | SUM  | UA (%)       |
| <b>Geo-Wiki<br/>samples</b> | Cropland   | 590      | 59     | 0     | 61        | 6     | 0        | 0      | 43         | 759  | 77.73        |
|                             | Forest     | 72       | 774    | 8     | 50        | 2     | 1        | 0      | 1          | 908  | 85.24        |
|                             | Shrub      | 38       | 118    | 10    | 177       | 2     | 0        | 10     | 0          | 355  | 2.82         |
|                             | Grassland  | 50       | 83     | 4     | 140       | 2     | 2        | 7      | 2          | 290  | 48.28        |
|                             | Water      | 3        | 2      | 0     | 2         | 14    | 0        | 0      | 1          | 22   | 63.64        |
|                             | Snow/Ice   | 3        | 2      | 0     | 44        | 7     | 17       | 17     | 0          | 90   | 18.89        |
|                             | Barren     | 28       | 25     | 1     | 401       | 2     | 1        | 45     | 2          | 505  | 8.91         |
|                             | Impervious | 17       | 2      | 0     | 3         | 2     | 0        | 0      | 47         | 71   | 66.20        |
|                             | SUM        | 801      | 1065   | 23    | 878       | 37    | 21       | 79     | 96         | 3000 |              |
|                             | PA (%)     | 73.66    | 72.68  | 43.48 | 15.95     | 37.84 | 80.95    | 56.96  | 48.96      |      | <b>54.57</b> |

**Table S21. Confusion matrix of ESACCI\_LC based on Geo-Wiki test samples. PA and UA are abbreviations for the producer's accuracy and user's accuracy, respectively. Bold number represents the overall accuracy.**

|                             |            | ESACCI_LC |        |       |           |       |          |        |            | SUM  | UA (%)       |
|-----------------------------|------------|-----------|--------|-------|-----------|-------|----------|--------|------------|------|--------------|
| Class                       |            | Cropland  | Forest | Shrub | Grassland | Water | Snow/Ice | Barren | Impervious |      |              |
| <b>Geo-Wiki<br/>samples</b> | Cropland   | 657       | 19     | 0     | 62        | 5     | 0        | 1      | 15         | 759  | 86.56        |
|                             | Forest     | 235       | 627    | 9     | 35        | 1     | 0        | 1      | 0          | 908  | 69.05        |
|                             | Shrub      | 107       | 77     | 0     | 167       | 1     | 0        | 2      | 1          | 355  | 0.00         |
|                             | Grassland  | 100       | 48     | 5     | 127       | 2     | 1        | 7      | 0          | 290  | 43.79        |
|                             | Water      | 4         | 0      | 0     | 2         | 15    | 0        | 1      | 0          | 22   | 68.18        |
|                             | Snow/Ice   | 10        | 3      | 0     | 50        | 2     | 12       | 13     | 0          | 90   | 13.33        |
|                             | Barren     | 69        | 19     | 3     | 371       | 2     | 1        | 40     | 0          | 505  | 7.92         |
|                             | Impervious | 20        | 0      | 0     | 3         | 0     | 0        | 0      | 48         | 71   | 67.61        |
|                             | SUM        | 1202      | 793    | 17    | 817       | 28    | 14       | 65     | 64         | 3000 |              |
|                             | PA (%)     | 54.66     | 79.07  | 0.00  | 15.54     | 53.57 | 85.71    | 61.54  | 75.00      |      | <b>50.87</b> |

**Table S22. Confusion matrix of MCD12Q1 based on Geo-Wiki test samples. PA and UA are abbreviations for the producer's accuracy and user's accuracy, respectively. Bold number represents the overall accuracy.**

|                             |            | <b>MCD12Q1</b>  |               |              |                  |              |                 |               |                   |            |               |
|-----------------------------|------------|-----------------|---------------|--------------|------------------|--------------|-----------------|---------------|-------------------|------------|---------------|
| <b>Class</b>                |            | <b>Cropland</b> | <b>Forest</b> | <b>Shrub</b> | <b>Grassland</b> | <b>Water</b> | <b>Snow/Ice</b> | <b>Barren</b> | <b>Impervious</b> | <b>SUM</b> | <b>UA (%)</b> |
| <b>Geo-Wiki<br/>samples</b> | Cropland   | 490             | 132           | 0            | 110              | 3            | 0               | 0             | 24                | 759        | 64.56         |
|                             | Forest     | 35              | 792           | 3            | 74               | 0            | 0               | 1             | 3                 | 908        | 87.22         |
|                             | Shrub      | 23              | 128           | 1            | 192              | 1            | 0               | 10            | 0                 | 355        | 0.28          |
|                             | Grassland  | 39              | 82            | 0            | 150              | 3            | 0               | 13            | 3                 | 290        | 51.72         |
|                             | Water      | 2               | 7             | 0            | 3                | 8            | 0               | 1             | 1                 | 22         | 36.36         |
|                             | Snow/Ice   | 2               | 3             | 0            | 41               | 1            | 7               | 36            | 0                 | 90         | 7.78          |
|                             | Barren     | 15              | 23            | 2            | 397              | 0            | 0               | 67            | 1                 | 505        | 13.27         |
|                             | Impervious | 13              | 5             | 0            | 9                | 0            | 0               | 0             | 44                | 71         | 61.97         |
|                             | SUM        | 619             | 1172          | 6            | 976              | 16           | 7               | 128           | 76                | 3000       |               |
|                             | PA (%)     | 79.16           | 67.58         | 16.67        | 15.37            | 50.00        | 100.00          | 52.34         | 57.89             |            | <b>51.97</b>  |

**Table S23. Confusion matrix of FROM-GLC based on Geo-Wiki test samples. PA and UA are abbreviations for the producer's accuracy and user's accuracy, respectively. Bold number represents the overall accuracy.**

|                             |            | FROM-GLC |        |       |           |       |          |        |            |      |              |
|-----------------------------|------------|----------|--------|-------|-----------|-------|----------|--------|------------|------|--------------|
| Class                       |            | Cropland | Forest | Shrub | Grassland | Water | Snow/Ice | Barren | Impervious | SUM  | UA (%)       |
| <b>Geo-Wiki<br/>samples</b> | Cropland   | 370      | 142    | 4     | 214       | 11    | 0        | 3      | 15         | 759  | 48.75        |
|                             | Forest     | 44       | 740    | 14    | 102       | 2     | 0        | 3      | 3          | 908  | 81.50        |
|                             | Shrub      | 19       | 129    | 5     | 165       | 4     | 0        | 33     | 0          | 355  | 1.41         |
|                             | Grassland  | 35       | 80     | 8     | 131       | 4     | 1        | 29     | 2          | 290  | 45.17        |
|                             | Water      | 1        | 4      | 0     | 3         | 13    | 0        | 0      | 1          | 22   | 59.09        |
|                             | Snow/Ice   | 4        | 5      | 0     | 26        | 11    | 7        | 37     | 0          | 90   | 7.78         |
|                             | Barren     | 10       | 44     | 5     | 261       | 8     | 1        | 176    | 0          | 505  | 34.85        |
|                             | Impervious | 20       | 4      | 0     | 8         | 3     | 0        | 1      | 35         | 71   | 49.30        |
|                             | SUM        | 503      | 1148   | 36    | 910       | 56    | 9        | 282    | 56         | 3000 |              |
|                             | PA (%)     | 73.56    | 64.46  | 13.89 | 14.40     | 23.21 | 77.78    | 62.41  | 62.50      |      | <b>49.23</b> |

**Table S24. Confusion matrix of CLCD based on GLCVSS test samples. PA and UA are abbreviations for the producer's accuracy and user's accuracy, respectively. Bold number represents the overall accuracy.**

|                           |            | CLCD     |        |       |           |       |          |        |            |      |              |
|---------------------------|------------|----------|--------|-------|-----------|-------|----------|--------|------------|------|--------------|
|                           | Class      | Cropland | Forest | Shrub | Grassland | Water | Snow/Ice | Barren | Impervious | SUM  | UA (%)       |
| <b>GLCVSS<br/>samples</b> | Cropland   | 280      | 43     | 1     | 25        | 1     | 0        | 0      | 7          | 357  | 78.43        |
|                           | Forest     | 38       | 453    | 1     | 17        | 0     | 0        | 0      | 2          | 511  | 88.65        |
|                           | Shrub      | 2        | 17     | 0     | 48        | 0     | 0        | 13     | 0          | 80   | 0.00         |
|                           | Grassland  | 22       | 47     | 2     | 205       | 0     | 0        | 3      | 3          | 282  | 72.70        |
|                           | Water      | 7        | 0      | 0     | 1         | 16    | 0        | 1      | 0          | 25   | 64.00        |
|                           | Snow/Ice   | 0        | 0      | 0     | 42        | 1     | 17       | 20     | 0          | 80   | 21.25        |
|                           | Barren     | 68       | 6      | 0     | 266       | 4     | 1        | 397    | 3          | 745  | 53.29        |
|                           | Impervious | 17       | 4      | 0     | 2         | 0     | 0        | 1      | 27         | 51   | 52.94        |
|                           | SUM        | 434      | 570    | 4     | 606       | 22    | 18       | 435    | 42         | 2131 |              |
|                           | PA (%)     | 64.52    | 79.47  | 0.00  | 33.83     | 72.73 | 94.44    | 91.26  | 64.29      |      | <b>65.46</b> |



**Table S25. Confusion matrix of ESACCI\_LC based on GLCVSS test samples. PA and UA are abbreviations for the producer's accuracy and user's accuracy, respectively. Bold number represents the overall accuracy.**

|                           |            | ESACCI_LC |        |       |           |       |          |        |            |      |              |
|---------------------------|------------|-----------|--------|-------|-----------|-------|----------|--------|------------|------|--------------|
|                           | Class      | Cropland  | Forest | Shrub | Grassland | Water | Snow/Ice | Barren | Impervious | SUM  | UA (%)       |
| <b>GLCVSS<br/>samples</b> | Cropland   | 302       | 27     | 0     | 22        | 0     | 0        | 0      | 6          | 357  | 84.59        |
|                           | Forest     | 139       | 349    | 5     | 17        | 0     | 0        | 0      | 1          | 511  | 68.30        |
|                           | Shrub      | 13        | 10     | 2     | 46        | 0     | 0        | 9      | 0          | 80   | 2.50         |
|                           | Grassland  | 61        | 32     | 1     | 175       | 0     | 0        | 12     | 1          | 282  | 62.06        |
|                           | Water      | 10        | 0      | 0     | 2         | 12    | 0        | 1      | 0          | 25   | 48.00        |
|                           | Snow/Ice   | 6         | 3      | 0     | 55        | 0     | 12       | 4      | 0          | 80   | 15.00        |
|                           | Barren     | 88        | 4      | 3     | 299       | 3     | 2        | 346    | 0          | 745  | 46.44        |
|                           | Impervious | 26        | 3      | 0     | 1         | 0     | 0        | 1      | 20         | 51   | 39.22        |
|                           | SUM        | 645       | 428    | 11    | 617       | 15    | 14       | 373    | 28         | 2131 |              |
|                           | PA (%)     | 46.82     | 81.54  | 18.18 | 28.36     | 80.00 | 85.71    | 92.76  | 71.43      |      | <b>57.16</b> |

**Table S26. Confusion matrix of MCD12Q1 based on GLCVSS test samples. PA and UA are abbreviations for the producer's accuracy and user's accuracy, respectively. Bold number represents the overall accuracy.**

|                           |            | <b>MCD12Q1</b>  |               |              |                  |              |                 |               |                   |            |               |
|---------------------------|------------|-----------------|---------------|--------------|------------------|--------------|-----------------|---------------|-------------------|------------|---------------|
| <b>Class</b>              |            | <b>Cropland</b> | <b>Forest</b> | <b>Shrub</b> | <b>Grassland</b> | <b>Water</b> | <b>Snow/Ice</b> | <b>Barren</b> | <b>Impervious</b> | <b>SUM</b> | <b>UA (%)</b> |
| <b>GLCVSS<br/>samples</b> | Cropland   | 210             | 87            | 0            | 49               | 1            | 0               | 0             | 10                | 357        | 58.82         |
|                           | Forest     | 43              | 431           | 1            | 32               | 0            | 0               | 0             | 4                 | 511        | 84.34         |
|                           | Shrub      | 0               | 10            | 0            | 56               | 0            | 0               | 14            | 0                 | 80         | 0.00          |
|                           | Grassland  | 23              | 50            | 1            | 200              | 0            | 0               | 8             | 0                 | 282        | 70.92         |
|                           | Water      | 2               | 8             | 0            | 3                | 8            | 0               | 2             | 2                 | 25         | 32.00         |
|                           | Snow/Ice   | 0               | 1             | 0            | 41               | 0            | 8               | 30            | 0                 | 80         | 10.00         |
|                           | Barren     | 47              | 16            | 1            | 234              | 0            | 3               | 442           | 2                 | 745        | 59.33         |
|                           | Impervious | 15              | 15            | 0            | 5                | 0            | 0               | 1             | 15                | 51         | 29.41         |
|                           | SUM        | 340             | 618           | 3            | 620              | 9            | 11              | 497           | 33                | 2131       |               |
|                           | PA (%)     | 61.76           | 69.74         | 0.00         | 32.26            | 88.89        | 72.73           | 88.93         | 45.45             |            | <b>61.66</b>  |

**Table S27. Confusion matrix of GlobaLand30 based on GLCVSS test samples. PA and UA are abbreviations for the producer's accuracy and user's accuracy, respectively. Bold number represents the overall accuracy.**

|            |                       | <b>GlobaLand30</b> |        |       |           |        |          |        |            |      |              |
|------------|-----------------------|--------------------|--------|-------|-----------|--------|----------|--------|------------|------|--------------|
|            | Class                 | Cropland           | Forest | Shrub | Grassland | Water  | Snow/Ice | Barren | Impervious | SUM  | UA (%)       |
|            | <b>GLCVSS samples</b> | Cropland           | 283    | 30    | 1         | 32     | 0        | 0      | 1          | 10   | 357          |
| Forest     |                       | 56                 | 395    | 1     | 56        | 0      | 0        | 0      | 3          | 511  | 77.30        |
| Shrub      |                       | 2                  | 14     | 2     | 49        | 0      | 1        | 12     | 0          | 80   | 2.50         |
| Grassland  |                       | 19                 | 34     | 3     | 212       | 0      | 1        | 12     | 1          | 282  | 75.18        |
| Water      |                       | 7                  | 4      | 1     | 2         | 10     | 0        | 1      | 0          | 25   | 40.00        |
| Snow/Ice   |                       | 0                  | 4      | 0     | 42        | 0      | 15       | 19     | 0          | 80   | 18.75        |
| Barren     |                       | 73                 | 8      | 4     | 254       | 0      | 3        | 401    | 2          | 745  | 53.83        |
| Impervious |                       | 14                 | 6      | 1     | 2         | 0      | 0        | 1      | 27         | 51   | 52.94        |
| SUM        |                       | 454                | 495    | 13    | 649       | 10     | 20       | 447    | 43         | 2131 |              |
| PA (%)     |                       | 62.33              | 79.80  | 15.38 | 32.67     | 100.00 | 75.00    | 89.71  | 62.79      |      | <b>63.12</b> |
